# Supplementary material for: A Red-Emitting Fluorescence Probe for Rapid Detecting Exogenous and Endogenous Peroxynitrite in Living Cells with High Sensitivity and Selectivity
Source: MDPI journal article supplement (doi:10.3390/chemosensors11110555), 2023-11-06
Supplement: s1 [file s1]

Supplementary

# A Red-Emitting Fluorescence Probe for Rapid Detecting Exogenous and Endogenous Peroxynitrite in Living Cells with High Sensitivity and Selectivity

Bing Jin <sup>1,\*</sup>, Jing Liu <sup>2,†</sup>, Longsheng Jin <sup>1</sup>, Weishuai Liu <sup>1</sup> and Xiangjun Liu <sup>2,\*</sup>

<sup>1</sup> Department of Chemistry, College of Sciences, Nanjing Agricultural University, 1 Weigang, Nanjing 210095, China; 2022211001@stu.njau.edu.cn (L.J.); 2021111022@stu.njau.edu.cn (W.L.)

<sup>2</sup> Beijing National Laboratory for Molecular Sciences, Key Laboratory of Analytical Chemistry for Living Biosystems, CAS Research/Education Center for Excellence in Molecular Sciences, Institute of Chemistry, Chinese Academy of Sciences, Beijing 100190, China; liujing231023@163.com

\* Correspondence: jinbing@njau.edu.cn (B.J.); xjliu@iccas.ac.cn (X.L.)

† These authors contributed equally to this work.

## Table of Contents

1. The synthetic route and method of BP613
2. Structure characterizations for BP613 and BP-ONOO
3. The sensing mechanism research of BP-ONOO toward ONOO<sup>-</sup>
4. Methods for preparing reactive oxygen species (ROS) and reactive nitrogen species (RNS)
5. Details for cell co-localization experiment
6. A comparison of fluorescent probes for ONOO<sup>-</sup>
7. References

## 1. The synthetic route and method of BP613

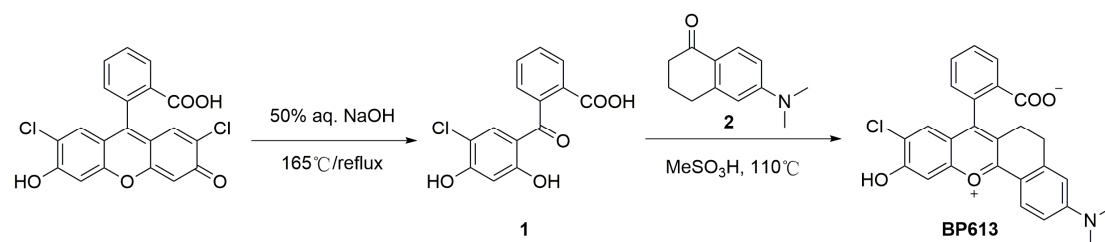

**Scheme S1.** Synthetic route for BP613.

## 2. Structure characterizations for BP613 and BP-ONOO

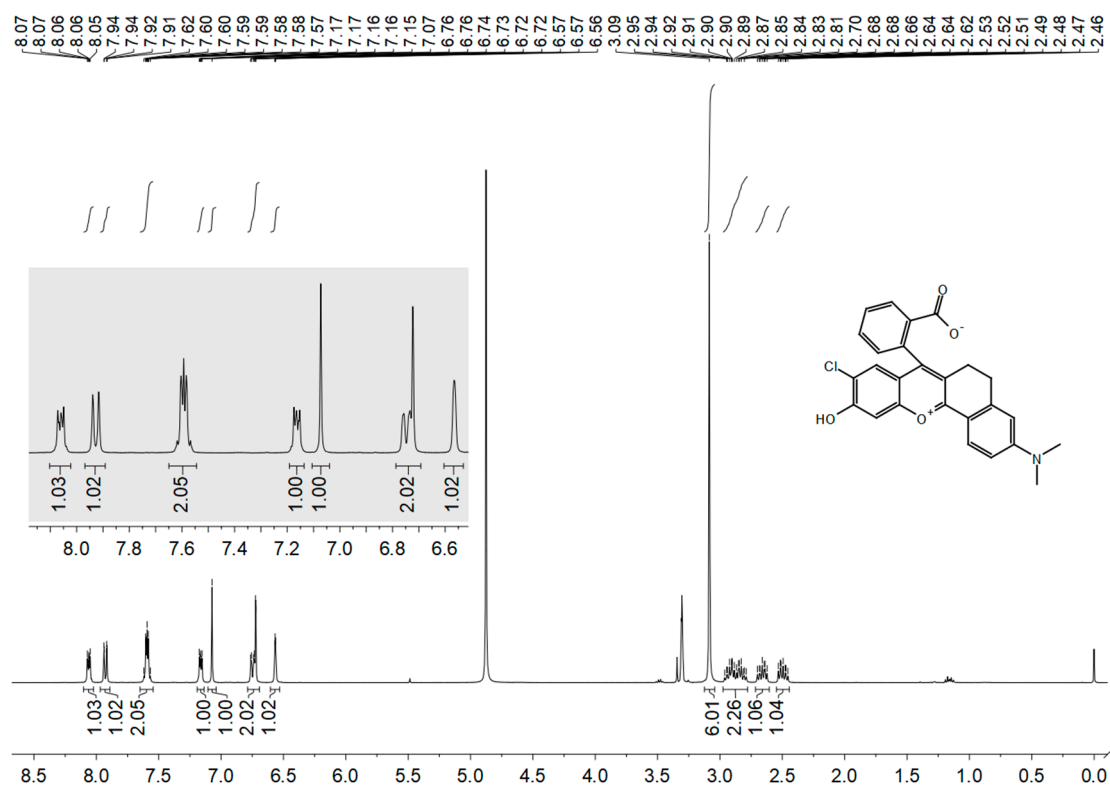

**Figure S1.** <sup>1</sup>H NMR spectrum of probe BP613 in CD<sub>3</sub>OD.

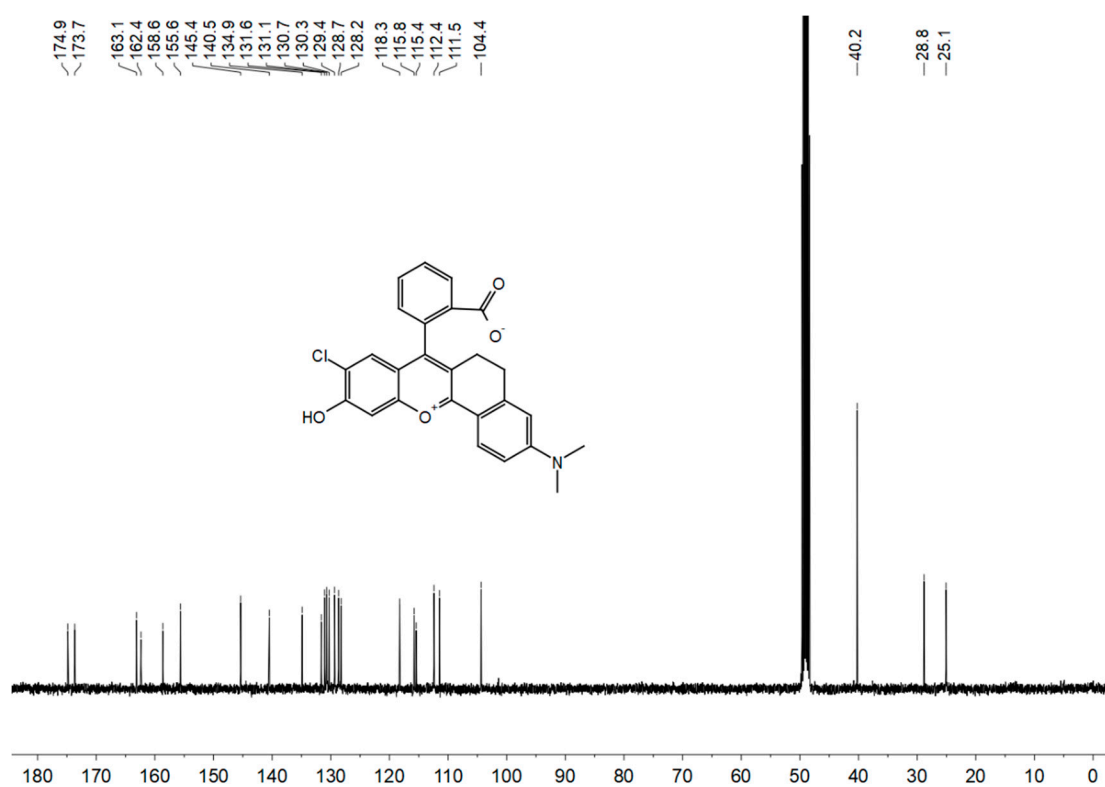

Figure S2. <sup>13</sup>C NMR spectrum of probe BP613 in CD<sub>3</sub>OD.

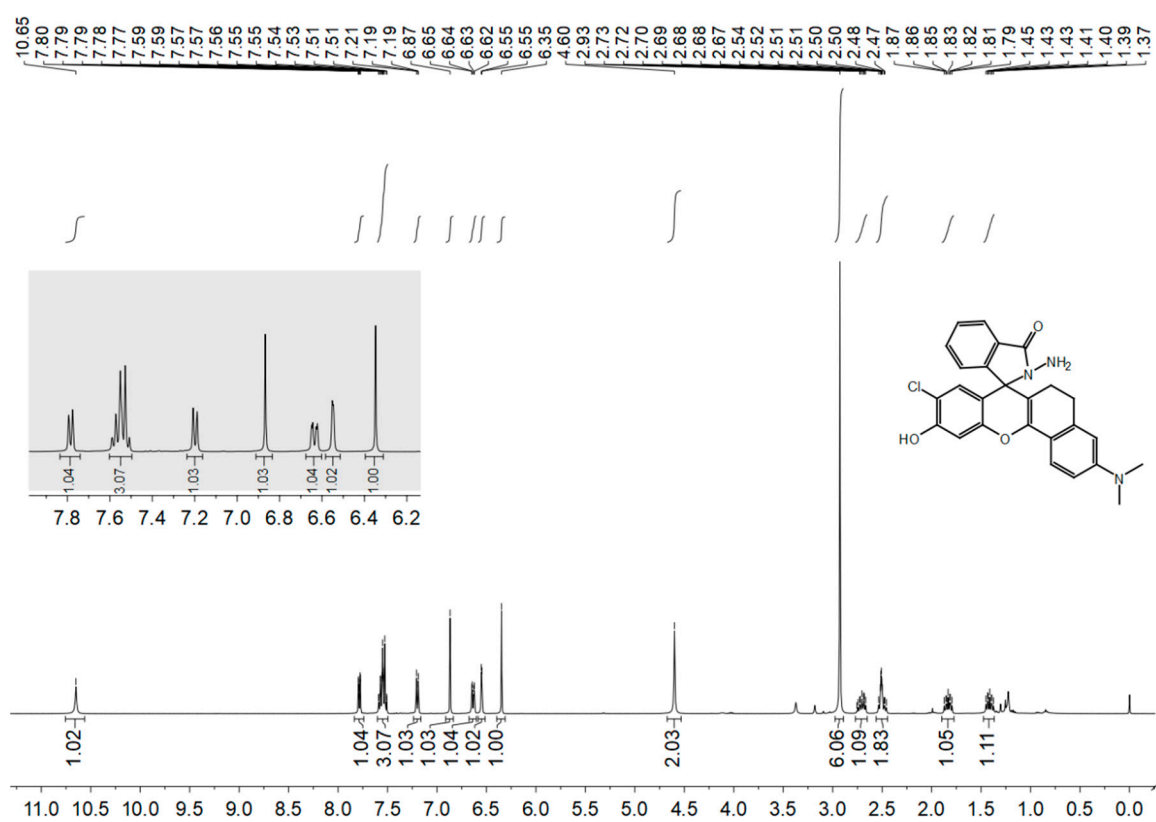

Figure S3. <sup>1</sup>H NMR spectrum of probe BP-ONOO in (CD<sub>3</sub>)<sub>2</sub>SO.

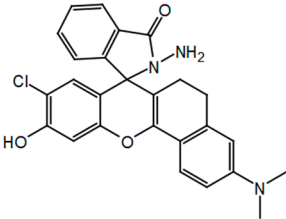

**Figure S4.**  $^{13}\text{C}$  NMR spectrum of probe BP-ONOO in  $(\text{CD}_3)_2\text{SO}$ .

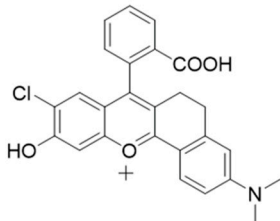

**Figure S5.** HR-MS spectrum of probe BP613.

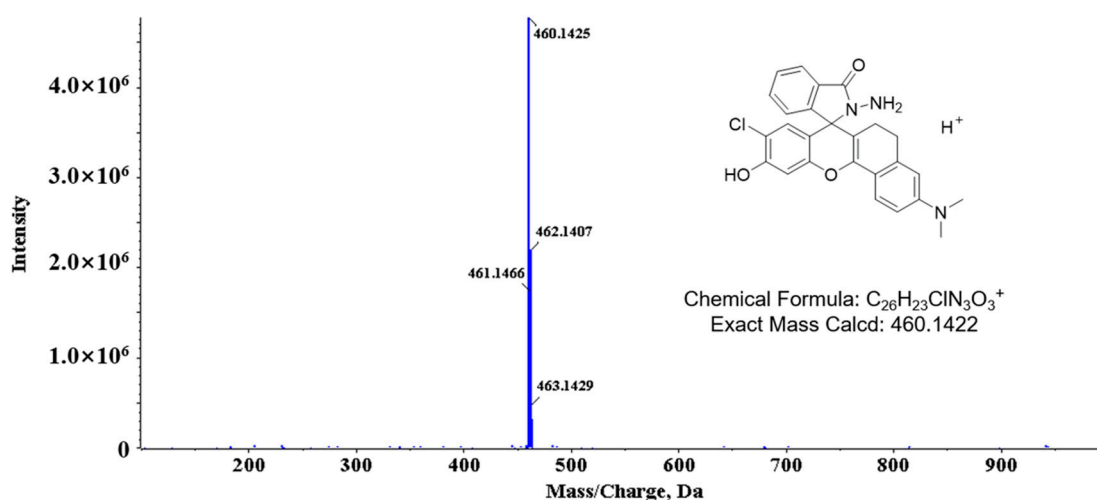

Figure S6. HR-MS spectrum of probe BP-ONOO.

### 3. The sensing mechanism research of BP-ONOO toward $ONOO^-$

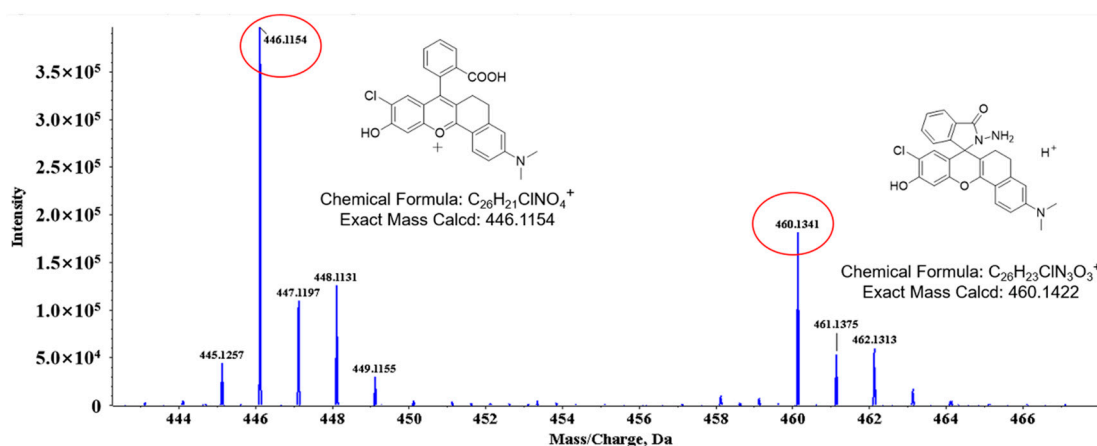

Figure S7. Mass spectrum of BP-ONOO mixed with one equiv. of  $ONOO^-$  in PBS buffer (20 mM, pH = 7.4).

### 4. Methods for preparing reactive oxygen species (ROS) and reactive nitrogen species (RNS)

- 1)  $ONOO^-$  stock solution was freshly prepared according to the previously described method [1], and the concentration of  $ONOO^-$  was determined by using an extinction coefficient of  $1670\text{ M}^{-1}\text{cm}^{-1}$  at 302 nm in 0.1 M aqueous sodium hydroxide solution.
- 2)  $H_2O_2$  solution was added directly. The concentration of the  $H_2O_2$  was determined from absorption at 240 nm with a molar extinction coefficient of  $43.6\text{ M}^{-1}\text{cm}^{-1}$ .
- 3)  $ClO^-$  stock solution was prepared by dissolving sodium hypochlorite pentahydrate in deionized water and the concentration was determined by measuring the absorbance at 292 nm with a molar extinction coefficient of  $350\text{ M}^{-1}\text{cm}^{-1}$ .
- 4)  $ROO^\bullet$  was generated from 2,2'-Azobis(2-amidinopropane)dihydrochloride, which was first dissolved in deionizer water, then added into the probe testing solutions at  $37^\circ\text{C}$  for 1 h.
- 5) TBHP (tertbutylhydroperoxide) was diluted from commercially available solution with ultrapure water.
- 6)  $\bullet\text{OH}$  (hydroxyl radical) were generated from Fenton reactions. To generate  $\bullet\text{OH}$ , ten equiv. of  $H_2O_2$  were added to ferrous chloride solution and the concentration of  $\bullet\text{OH}$  was equal to the  $\text{Fe(II)}$   $\text{FeCl}_2$  concentration.
- 7)  $O_2^{\bullet-}$  (superoxide radical anion) was generated from dissolving  $KO_2$  in DMSO.
- 8)  $\bullet\text{NO}$  (Nitric oxide) was generated from potassium nitroprusside dehydrate.

## 5. Details for cell co-localization experiment

The HeLa cells were seeded in confocal dishes and divided into three groups. Each group was incubated in RPMI-1640 medium containing BP-ONOO (20  $\mu$ M) for 30 min at 37  $^{\circ}$ C; after that, cells in each group were washed with PBS three times and incubated with LysoTracker Green (1  $\mu$ M), Hoechst 33342 (1  $\mu$ M), MitoTracker Green (1  $\mu$ M) for another 30 min. After washing with PBS three times to remove the remaining BP-ONOO and other commercial dyes, the cells were further incubated with 200  $\mu$ M of SIN-1 in serum-free media for 30 min at 37  $^{\circ}$ C. Finally, the cells were washed three times with PBS and subjected to fluorescence imaging. For BP-ONOO, the emission was collected at 600–700 nm (excited at 570 nm). For Lyso-Tracker/Mito-Tracker, the emission was collected at 500–600 nm (excited at 488 nm), for Hoechst 33342, the emission was collected at 410–500 nm (excited at 408 nm).

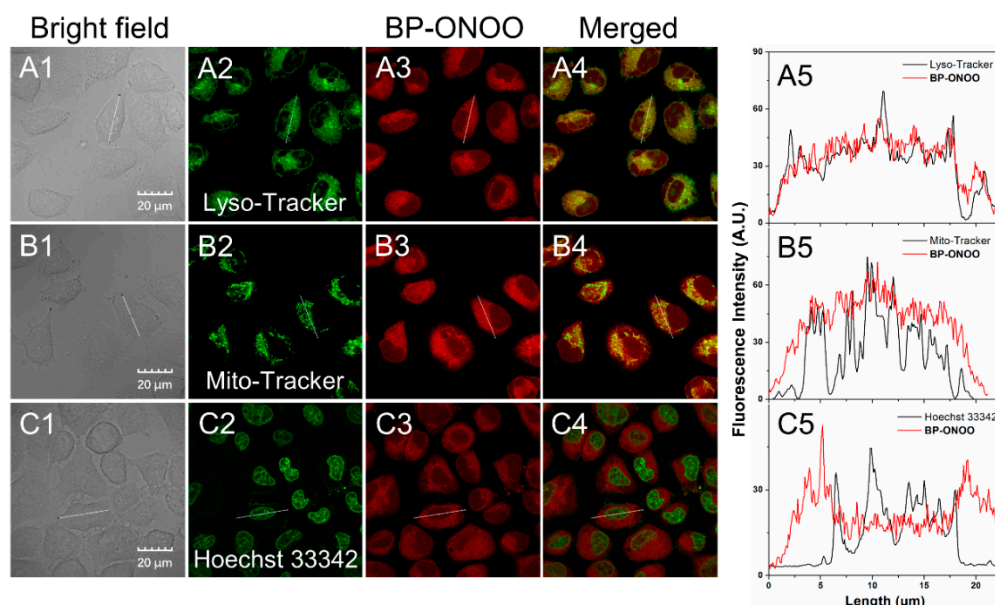

**Figure S8.** Co-localization experiment within HeLa cells. Cells were co-stained with BP-ONOO (20  $\mu$ M) and commercial dyes sequentially, then treated with SIN-1 (200  $\mu$ M). Top: LysoTracker Green and BP-ONOO. Middle: MitoTracker Green and BP-ONOO. Bottom: Hoechst 33342 and BP-ONOO. (A1–C1) Bright field. (A2–C2) Channel of commercial dyes. (A3–C3) Channel of BP-ONOO. (A4–C4) Merged images of BP-ONOO and the corresponding dyes. (A5–C5) Fluorescence intensity profiles of BP-ONOO and corresponding commercial dyes within the linear ROI. Scale bar represents 20  $\mu$ m.

## 6. Table S1. A comparison of fluorescent probes for ONOO $^-$ .

| Probe                                                                               | $\lambda_{em}$ (nm) | Time    | LOD     | Biological applications | Ref. |
|-------------------------------------------------------------------------------------|---------------------|---------|---------|-------------------------|------|
| 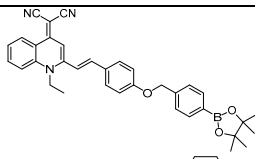 | 620                 | < 4 min | 27.5 nM | Living cells            | [2]  |
|  | 522                 | 50 s    | 0.83 nM | Living cells            | [3]  |

|                                                                                     |     |         |        |                            |           |
|-------------------------------------------------------------------------------------|-----|---------|--------|----------------------------|-----------|
| 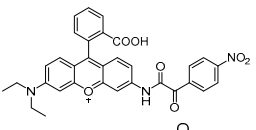   | 558 | 40 min  | 43 nM  | Living cells               | [4]       |
|    | 495 | < 40s   | 19 nM  | Living cells               | [5]       |
|    | 820 | 10 min  | 917 nM | Living cells,<br>Live mice | [6]       |
|    | 535 | < 5 s   | 10 nM  | Living cells;<br>tissues   | [7]       |
|    | 578 | 20 min  | 53 nM  | Living cells               | [8]       |
|   | 456 | < 3 min | 326 nM | Living cells               | [9]       |
|  | 613 | < 4 s   | 18 nM  | Living cells               | This work |

## 7. References

- Uppu, R. M. Synthesis of peroxynitrite using isoamyl nitrite and hydrogen peroxide in a homogeneous solvent system. *Anal. Biochem.* **2006**, *354*, 165–168.
- Han, X.; Yang, X.; Zhang, Y.; Li, Z.; Cao, W.; Zhang, D.; Ye, Y. A novel activatable AIEgen fluorescent probe for peroxynitrite detection and its application in EC1 cells. *Sens. Actuators B Chem.* **2020**, *321*, 128510–128516.
- Zhang, J.; Li, Y.; Zhao, J.; Guo, W. An arylboronate-based fluorescent probe for selective and sensitive detection of peroxynitrite and its applications for fluorescence imaging in living cells. *Sens. Actuators B Chem.* **2016**, *237*, 67–74.
- Cheng, D.; Xu, W.; Yuan, L.; Zhang, X. Investigation of Drug-Induced Hepatotoxicity and Its Remediation Pathway with Reaction-Based Fluorescent Probes. *Anal. Chem.* **2017**, *89*, 7693–7700.
- Yang, R.; Dou, Y.; Zhang, Y.; Qu, L.; Sun, Y.; Li, Z. A facile and highly efficient fluorescent turn-on switch strategy based on diketone isomerization and its application in peroxynitrite fluorescent imaging. *Sens. Actuators B Chem.* **2021**, *337*, 129805–129813.
- Yu, F.; Li, P.; Wang, B.; Han, K. Reversible near-infrared fluorescent probe introducing tellurium to mimetic glutathione peroxidase for monitoring the redox cycles between peroxynitrite and glutathione in vivo. *J Am Chem Soc* **2013**, *135*, 7674–7680.
- Peng, T.; Wong, N.K.; Chen, X.; Chan, Y.K.; Sun, Z.; Hu, J.J.; Shen, J.; El-Nezami, H.; Yang, D. Molecular imaging of peroxynitrite with HKGreen-4 in live cells and tissues. *J Am Chem Soc* **2014**, *136*, 11728–11734.
- Li, H.; Li, X.; Wu, X.; Shi, W.; Ma, H. Observation of the Generation of ONOO<sup>-</sup> in Mitochondria under Various Stimuli with a Sensitive Fluorescence Probe. *Anal. Chem.* **2017**, *89*, 5519–5525.
- Li, J.; Peng, S.; Li, Z.; Zhao, F.; Han, X.; Liu, J.; Cao, W.; Ye, Y. Visualization of peroxynitrite in cyclophosphamide-induced oxidative stress by an activatable probe. *Talanta* **2022**, *238*, 123007–123013.
